# Supplementary material for: New Eugenol Derivatives with Enhanced Insecticidal Activity
Source: PubMed Central journal article supplement (PMC7729565; doi:10.3390/ijms21239257), 2020-12-04
Supplement: ijms-21-09257-s001.pdf [file ijms-21-09257-s001.pdf]

## Supplementary Information

# New Eugenol Derivatives with Enhanced Insecticidal Activity

Maria José G. Fernandes <sup>1</sup>, Renato B. Pereira <sup>2</sup>, David M. Pereira <sup>2,\*</sup>, A. Gil Fortes <sup>1</sup>,  
Elisabete M. S. Castanheira <sup>3</sup> and M. Sameiro T. Gonçalves <sup>1,\*</sup>

<sup>1</sup> Centre of Chemistry, Department of Chemistry, Campus of Gualtar, University of Minho, 4710-057 Braga, Portugal; mjfernandes@quimica.uminho.pt (M.J.G.F.); gilf@quimica.uminho.pt (A.G.F.)

<sup>2</sup> REQUIMTE/LAQV, Laboratory of Pharmacognosy, Department of Chemistry, Faculty of Pharmacy, University of Porto, R. Jorge Viterbo Ferreira, 228, 4050-313 Porto, Portugal; rjpereira@ff.up.pt

<sup>3</sup> Centre of Physics, Department of Physics, Campus of Gualtar, University of Minho, 4710-057 Braga, Portugal; ecoutinho@fisica.uminho.pt

\* Correspondence: dpereira@ff.up.pt (D.M.P.); msameiro@quimica.uminho.pt (M.S.T.G.); Tel.: +351-253-604-372 (M.S.T.G.)

Received: 2 November 2020; Accepted: 1 December 2020; Published: date

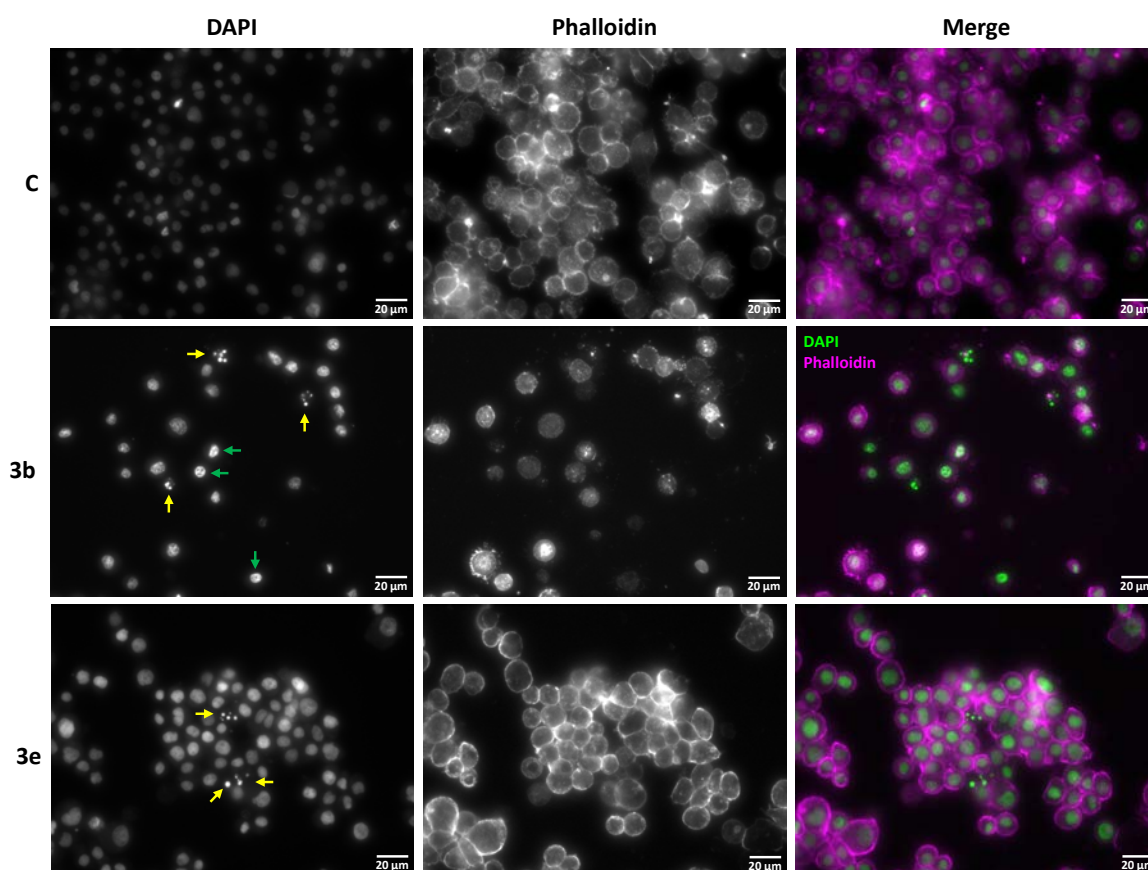

**Figure S1** - Morphology of *Sf9* cells exposed to the indicated molecules (3b 100 µg mL<sup>-1</sup>; 3e 50 µg mL<sup>-1</sup>) after 24 h of incubation (S Plan Fluor ELWD 40x DIC N1 objective). Overall cell morphology was evaluated using phalloidin (actin) and chromatin status (DAPI). Yellow arrow: chromatin fragmentation; Green arrow: chromatin condensation. C – Control.

**Table S1** – Percentage of cells displaying normal, condensed and fragmented chromatin in control, **3b**- and **3e**-treated *Sf9* cells. Conditions as in **Figure 2**.

|           | <b>Normal</b> | <b>Condensed</b> | <b>Fragmented</b> |
|-----------|---------------|------------------|-------------------|
| <b>C</b>  | 95.5 ± 1.8 %  | 4.3 ± 1.9 %      | -                 |
| <b>3b</b> | 52.7 ± 4.2%   | 34.8 ± 0.3 %     | 12.6 ± 4.2 %      |
| <b>3e</b> | 73.0 ± 0.8 %  | 21.2 ± 0.8 %     | 5.8 ± 0.5 %       |
